# Supplementary material for: 19F NMR indicator displacement assay using a synthetic receptor with appended paramagnetic relaxation agent
Source: Royal Society of Chemistry journal article supplement (doi:10.1039/c4cc04159c), 2014-01-01
Supplement: c4cc04159c1.pdf [file c4cc04159c1.pdf]

*Electronic Supplementary Information for:*

**$^{19}\text{F}$  NMR indicator displacement assay using synthetic receptor with appended relaxation agent**

Adam J. Plaunt, Kasey J. Clear, and Bradley D. Smith\*

Department of Chemistry and Biochemistry, 236 Nieuwland Science Hall, University of Notre Dame, Notre Dame, 46556 IN, USA

**Contents**

|                                         |     |
|-----------------------------------------|-----|
| 1. Supplementary Figures .....          | S2  |
| 2. $^{19}\text{F}$ NMR Acquisition..... | S5  |
| 3. Chemical Synthesis.....              | S6  |
| 4. NMR Data.....                        | S11 |
| 5. LCMS Data .....                      | S18 |
| 6. References.....                      | S19 |

## 1. Supplementary Figures

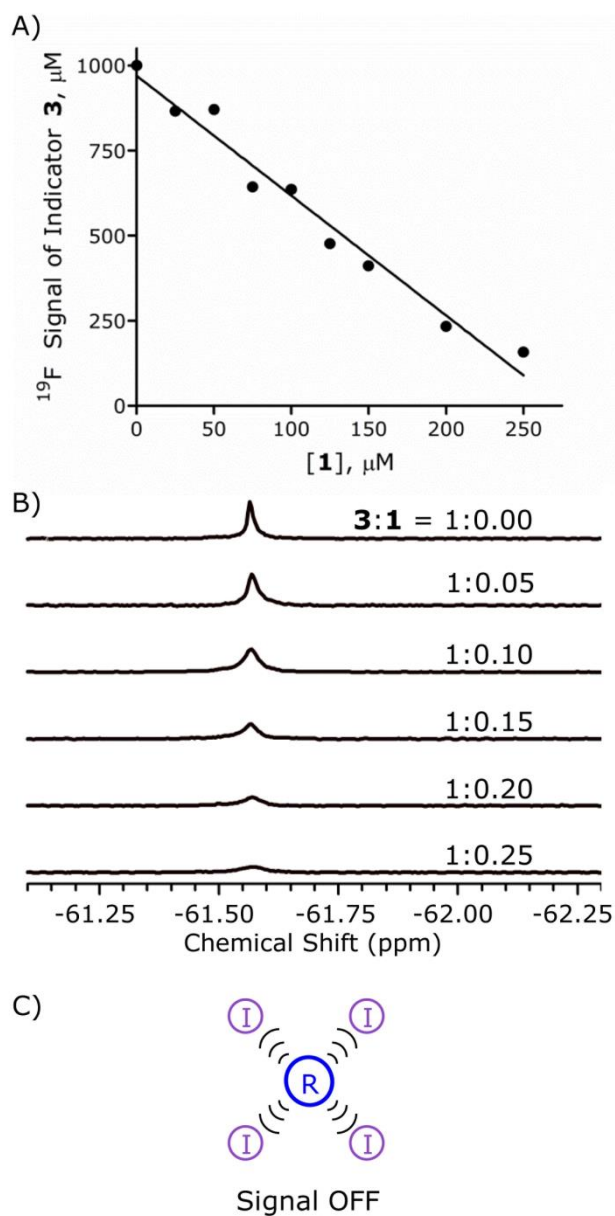

**Figure S1.** (A) Plot of  $^{19}\text{F}$  NMR peak height of indicator **3** (1000  $\mu\text{M}$ ) upon addition of receptor **1**. (B) Representative  $^{19}\text{F}$  NMR spectra (376 MHz) used to create the plot.  $N = 8$  scans, 10 mM HEPES, pH 7.4, 25  $^{\circ}\text{C}$ , external trifluoroethanol (TFE) as reference. (C) Schematic rationalization of data showing receptor **R** quenching an average of four copies of indicator **I** due to rapid exchange.

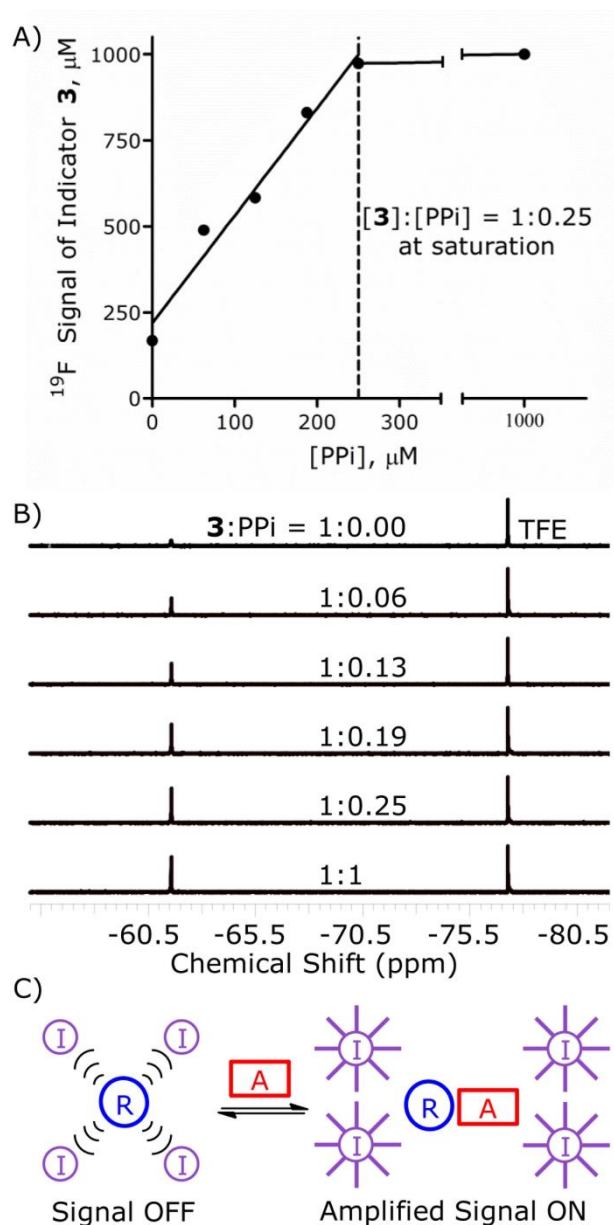

**Figure S2.** (A) Plot of  $^{19}\text{F}$  NMR peak height of indicator **3** (1000  $\mu\text{M}$ ) upon addition of PPi (0 – 1.0 mM) to the admixture of **1:3** (250  $\mu\text{M}$ :1000  $\mu\text{M}$ ). (B) Representative  $^{19}\text{F}$  NMR spectra (376 MHz) used to create the plot. N = 8 scans, 10 mM HEPES, pH 7.4, 25 ° C, external trifluoroethanol (TFE) as reference. (C) Schematic rationalization of the data.

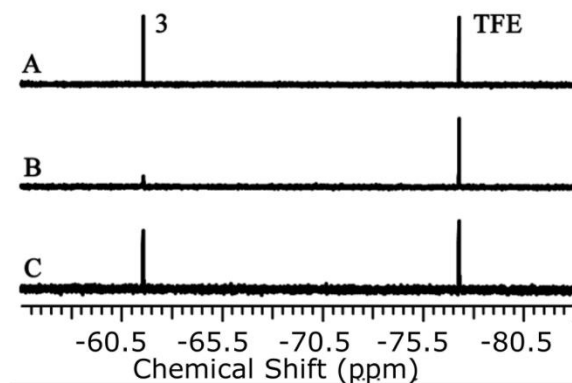

**Figure S3:**  $^{19}\text{F}$  NMR spectra of indicator **3** alone (A, 1.0 mM **3**), after addition of receptor **1** (B, 0.25 mM **1**), and after further addition of PPI (C, 5.0 mM PPI). N = 8 scans, 10 mM HEPES, pH 7.4, 25 ° C, external trifluoroethanol (TFE) as reference.

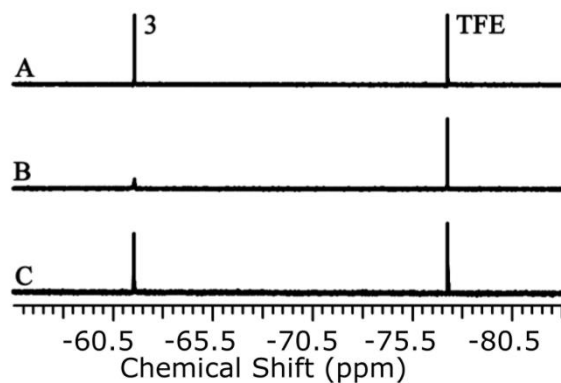

**Figure S4:**  $^{19}\text{F}$  NMR spectra of indicator **3** (A, 1.0 mM **3**) after addition of receptor **2** (B, 0.25 mM **1**), and after further addition of PPI (C, 5.0 mM PPI). N = 8 scans, 10 mM HEPES, pH 7.4, 25 ° C, external trifluoroethanol (TFE) as reference.

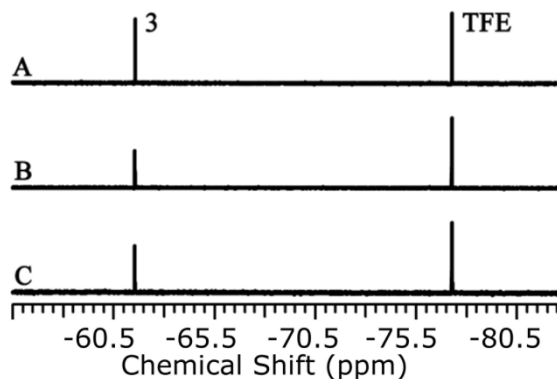

**Figure S5:**  $^{19}\text{F}$  NMR spectra of indicator **3** alone (A, 1.0 mM **3**), after addition of RA **apo-2** (B, 0.25 mM **1**), and after further addition of PPI (C, 5.0 mM PPI). N = 8 scans, 10 mM HEPES, pH 7.4, 25 ° C, external trifluoroethanol (TFE) as reference.

## 2. $^{19}\text{F}$ NMR Acquisition:

$^{19}\text{F}$  NMR spectra were acquired using a Bruker instrument (376 MHz) with proton-decoupling and external trifluoroethanol as a reference (5.0 mM trifluoroethanol in  $\text{D}_2\text{O}$ ).  $T_1$  relaxation times were measured using an inversion recovery pulse sequence, and a spin-echo pulse sequence was used to measure  $T_2$  relaxation times.

### 3. Chemical Synthesis:

#### General Schemes

The synthetic route to prepare ZnBDPA receptor **1** is shown in Scheme S1. Compound **S1** was prepared from 3-Carboxy-proxyl (Sigma Aldrich, St. Louise, MO, USA) following literature precedent.<sup>1</sup> Treatment of activated NHS ester **S1** with the known amine **S2**<sup>2</sup> resulted in amide bond formation and **apo-1**. Subsequent treatment with  $\text{Zn}(\text{NO}_3)_2$  in methanol produced ZnBDPA receptor **1**.

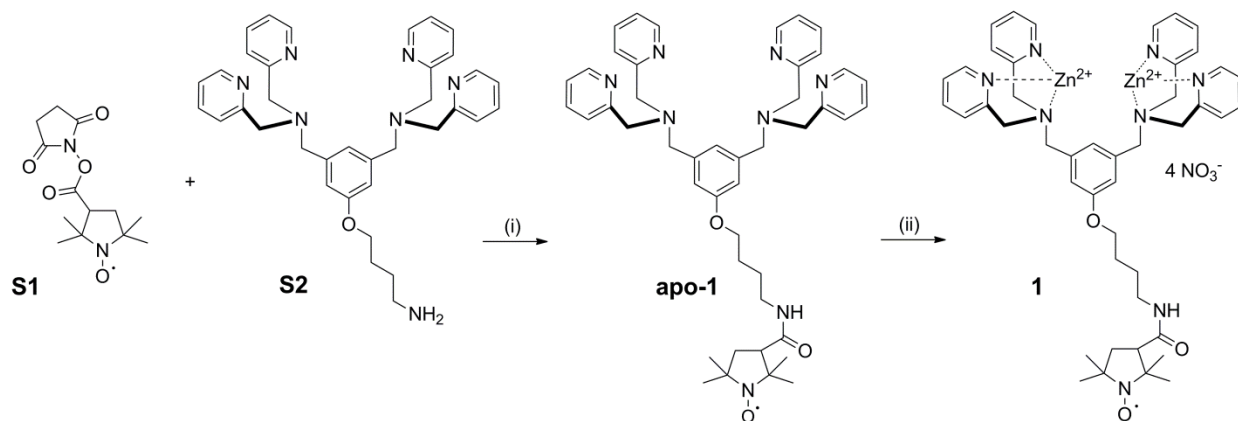

<sup>a</sup>Reagents and conditions: (i) DMF,  $\text{CHCl}_3$  87%; (ii)  $\text{Zn}(\text{NO}_3)_2 \cdot 6\text{H}_2\text{O}$ , MeOH, quantitative.

**Scheme S1:** Synthesis of receptor **1**<sup>a</sup>

The synthetic route to prepare ZnBDPA receptor **2** is shown in Scheme S2. Treatment of **S2** with DOTA-mono-NHS-tris(<sup>t</sup>Bu-Ester) **S3** produced **S4** in 60% yield. The <sup>t</sup>Bu-ester groups were removed using standard deprotection conditions to yield unprotected DOTA derivative **S5**. Standard lanthanide chelation protocols were used to yield **apo-2**.<sup>3</sup> Subsequent treatment with Zn(NO<sub>3</sub>)<sub>2</sub> in methanol produced ZnBDPA receptor **2**.

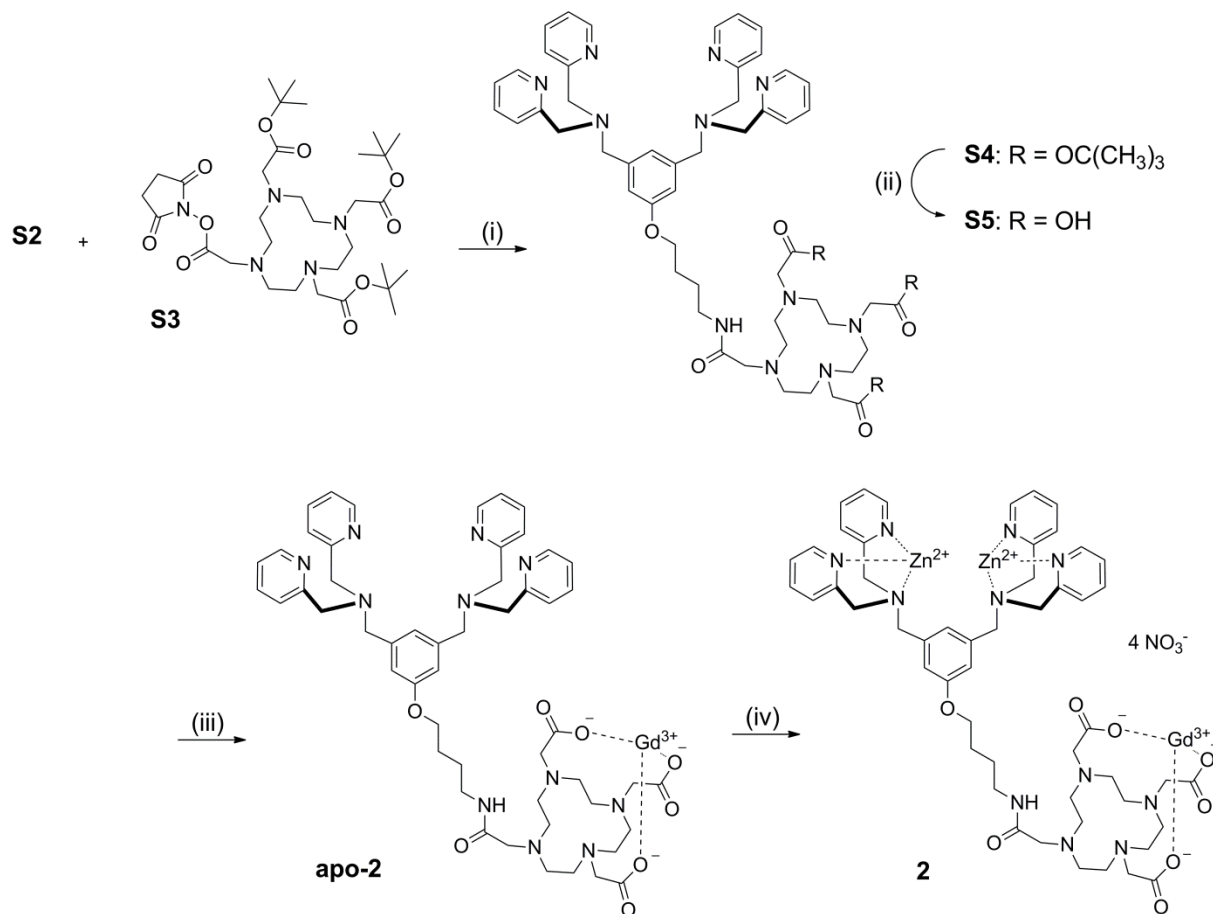

<sup>a</sup>Reagents and conditions: (i) TEA, CHCl<sub>3</sub>, 18 h, 60%; (ii) TFA, CH<sub>2</sub>Cl<sub>2</sub>, rt, 12 h, 94%; (iii) GdCl<sub>3</sub>, 0.1 M NH<sub>4</sub>OAc pH 8.0, 18 h; (iv) Zn(NO<sub>3</sub>)<sub>2</sub> · 6H<sub>2</sub>O, MeOH, quantitative.

**Scheme S2:** Synthesis of receptor **2**<sup>a</sup>

A literature route was used to prepare indicator **3** (Scheme S3).<sup>4</sup>

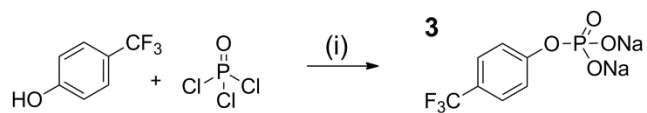

<sup>a</sup>Reagents and conditions: (i) Pyridine, 0 °C, 45 m; H<sub>2</sub>O, cyclohexylamine, pH 9; Ion exchange chromatography.

**Scheme S3:** Synthesis of <sup>19</sup>F NMR indicator **3**<sup>a</sup>



## Synthetic Procedures

**Apo-1:** NHS-3-carboxy-proxyl **S1** was prepared using the method of Liu<sup>1</sup>. Butylamine DPA **S2** (52 mg, 88  $\mu$ mol) and **S1** (52 mg, 180  $\mu$ mol) were combined in a 1:1 solution of DMF:CHCl<sub>3</sub> (4 mL) and allowed to stir at room temperature for 36 h. The solvent was evaporated and the residue purified by silica gel column chromatography with 2-10% MeOH in CHCl<sub>3</sub> as the eluent to yield the desired product (58.6 mg, 87 %) as a sticky yellow oil. LCMS analysis was performed to verify compound purity (see Figure S6). <sup>1</sup>H NMR: (500 MHz, CDCl<sub>3</sub>)  $\delta$  1.68-1.95 (m, 6H), 3.32-3.55 (m, 2H), 3.67 (br s, 4H), 3.82 (br s, 8H), 3.96-4.06 (m, 2H), 6.85 (br s, 2H), 7.08 (br s, 1H), 7.16 (br s, 4H), 7.61 (br s, 8H), 8.52 (br s, 4H); Mass Spectroscopy: MS (ESI+) calculated for C<sub>45</sub>H<sub>56</sub>N<sub>8</sub>O<sub>3</sub> ([M+H]<sup>+</sup>) 756.4470, found 756.4498.

**S4:** To a solution of 72 mg (120  $\mu$ mol) butylamine DPA **S2** in 250  $\mu$ L anhydrous CHCl<sub>3</sub> and 10  $\mu$ L triethylamine was added 25 mg (31  $\mu$ mol) DOTA-mono-NHS-tris(<sup>t</sup>Bu-Ester) **S3**. The reaction stirred for 18 h after which the solvent was removed *in vacuo*. The crude material was purified using silica gel column chromatography with 0-10% MeOH in CHCl<sub>3</sub> as the eluent to yield 24.2 mg (60 % yield) of the desired product as a colorless oil. <sup>1</sup>H NMR: (600 MHz, CDCl<sub>3</sub>)  $\delta$  1.41 (s, 18H), 1.44 (s, 9H), 1.68 (p, J = 7 Hz, 2H), 1.78 (p, J = 7 Hz, 2H), 2.10-3.00 (br m, 24 H), 3.26 (q, J = 6 Hz, 2H), 3.63 (s, 4H), 3.79 (s, 8H), 3.92 (t, J = 6 Hz, 2H), 6.64 (t, J = 5 Hz, 1H), 6.82 (s, 2H), 7.04 (s, 1H), 7.13 (qd, J = 7 Hz, J = 1 Hz, 4H), 7.60 (d, J = 7 Hz, 4H), 7.66 (td, J = 7 Hz, J = 2 Hz, 4H), 7.48 (dq, J = 5 Hz, J = 1 Hz, 4H) ppm; <sup>13</sup>C NMR: (600 MHz, CDCl<sub>3</sub>)  $\delta$  14.2, 21.0, 25.9, 26.7, 27.9, 39.1, 55.7, 55.9, 58.6, 60.0, 60.4, 67.4, 81.7, 81.8, 113.5, 121.3, 122.0, 122.8, 136.7, 140.4, 148.8, 159.2, 159.5, 171.2, 171.6, 172.4 ppm; Mass Spectroscopy: MS (ESI+) calculated for C<sub>64</sub>H<sub>91</sub>N<sub>11</sub>NaO<sub>8</sub> ([M+Na]<sup>+</sup>) 1164.6944, found 1164.6964.

**S5:** To a solution of 25 mg (22  $\mu$ mol) **S4** in 400  $\mu$ L CH<sub>2</sub>Cl<sub>2</sub> was added 600  $\mu$ L of TFA. The reaction mixture was allowed to proceed at ambient temperature for 16 h. The solvent was removed and the residue was washed 3 times with Et<sub>2</sub>O after which the residue was subjected to high vacuum. 20.0 mg (94 % yield) of the desired product was obtained as a yellow oil. <sup>1</sup>H NMR: (600 MHz, DMSO-d<sub>6</sub>)  $\delta$  1.57 (p, J = 8 Hz, 2H), 1.72 (p, J = 8 Hz, 2H), 3.00-3.80 (br m, 24 H), 3.92 (t, J = 7.5 Hz, 2H), 4.03 (s, 4H), 4.08 (br s, 2H), 4.15 (s, 8H), 6.98 (s, 2H), 7.14 (s, 2H), 7.40-7.54 (m, 4H), 7.53 (d, J = 8 Hz, 4H), 7.86 (dt, J = 8 Hz, J = 2 Hz, 4H), 8.58-8.59 (m, 4H) ppm; Mass Spectroscopy: MS (ESI+) calculated for C<sub>52</sub>H<sub>68</sub>N<sub>11</sub>O<sub>8</sub> ([M+H]<sup>+</sup>) 974.5225, found 974.5247.

**Apo-2:** Standard lanthanide chelation protocols were used to yield **apo-2**.<sup>3</sup> Chelator **S5** (9.5 mg, 8.4 nmol) was dissolved in 0.1 M ammonium acetate (1.0 mL, pH adjusted to 8 with aqueous  $\text{NH}_4\text{OH}$ ) and treated with 3 molar equivalents of  $\text{GdCl}_3$  (10.9 mg, 29.0 nmol). The reaction mixture was stirred at room temperature overnight. Excess  $\text{GdCl}_3$  and ammonium salts were removed using a SEP-PAK  $\text{C}_{18}$  reverse-phase column with repetitive washing (10 mL DI  $\text{H}_2\text{O}$ ). The final product was eluted using 50% aqueous acetonitrile (2 mL) and lyophilized. Previous work by Meade & co-workers has shown that lanthanide metals preferentially coordinate to DOTA chelators in the presence of dipicolylamine moieties.<sup>3a</sup> LCMS analysis was performed to verify chelate purity (see Figure S7). Mass Spectroscopy: MS (ESI+) calculated for  $\text{C}_{52}\text{H}_{66}\text{GdN}_{11}\text{O}_8$  ( $[\text{M}+2\text{H}]^{2+}$ ) 567.7177, found 565.2169.

**Receptors 1 or 2:** Stock solutions of  $\text{Zn}(\text{NO}_3)_2 \cdot 6\text{H}_2\text{O}$  and BDPA scaffold (**apo-1** or **apo-2**) were prepared in MeOH. Separate samples were mixed at a  $[\text{Zn}^{2+}]:[\text{DPA}]$  molar ratio of 1:1 and allowed to shake for 1 h before the solvent was removed by rotary evaporation followed by sitting under vacuum for 1 h. The resulting samples of ZnBDPA receptors **1** or **2** were used without further purification.

**Indicator 3:** A solution of 4-(trifluoromethyl)phenol (1.0 g, 6.2 mmol) in anhydrous pyridine (6.0 mL) was added dropwise to a stirred, cooled solution of  $\text{POCl}_3$  (920  $\mu\text{L}$ , 9.9 mmol) dissolved in anhydrous pyridine (6.0 mL). The reaction mixture was allowed to stir for 45 m and was then poured onto ice. The pH of the solution was adjusted to 9 upon addition of cyclohexylamine. The crude product was isolated by filtration to yield a white solid that was recrystallized from hot ethanol to obtain **3** as a cyclohexylammonium salt. Ion exchange chromatography with Amberlite 200c resin (Na form) produced **3** as the sodium salt (1.1 g, 41% Yield).  $^1\text{H}$  NMR (400 MHz,  $\text{D}_2\text{O}$ )  $\delta$  7.23 (d,  $J = 12$  Hz, 2H), 7.57 (d,  $J = 12$  Hz, 2H) ppm;  $^{19}\text{F}$  NMR (376 MHz,  $\text{D}_2\text{O}$ )  $\delta$  88.93 ppm (relative to an internal  $\text{KBF}_4$  standard);  $^{31}\text{P}$  NMR (160 MHz,  $\text{D}_2\text{O}$ )  $\delta$  147.81 ppm (relative to an internal  $\text{NaPF}_6$  standard); Mass Spectroscopy: MS (negative ESI) calculated for  $\text{C}_7\text{H}_5\text{F}_3\text{O}_4\text{P}$  ( $[\text{M}-\text{H}]^-$ ) 240.9883, found 240.9906.

#### 4. NMR Data

##### Apo-1 $^1\text{H}$ NMR

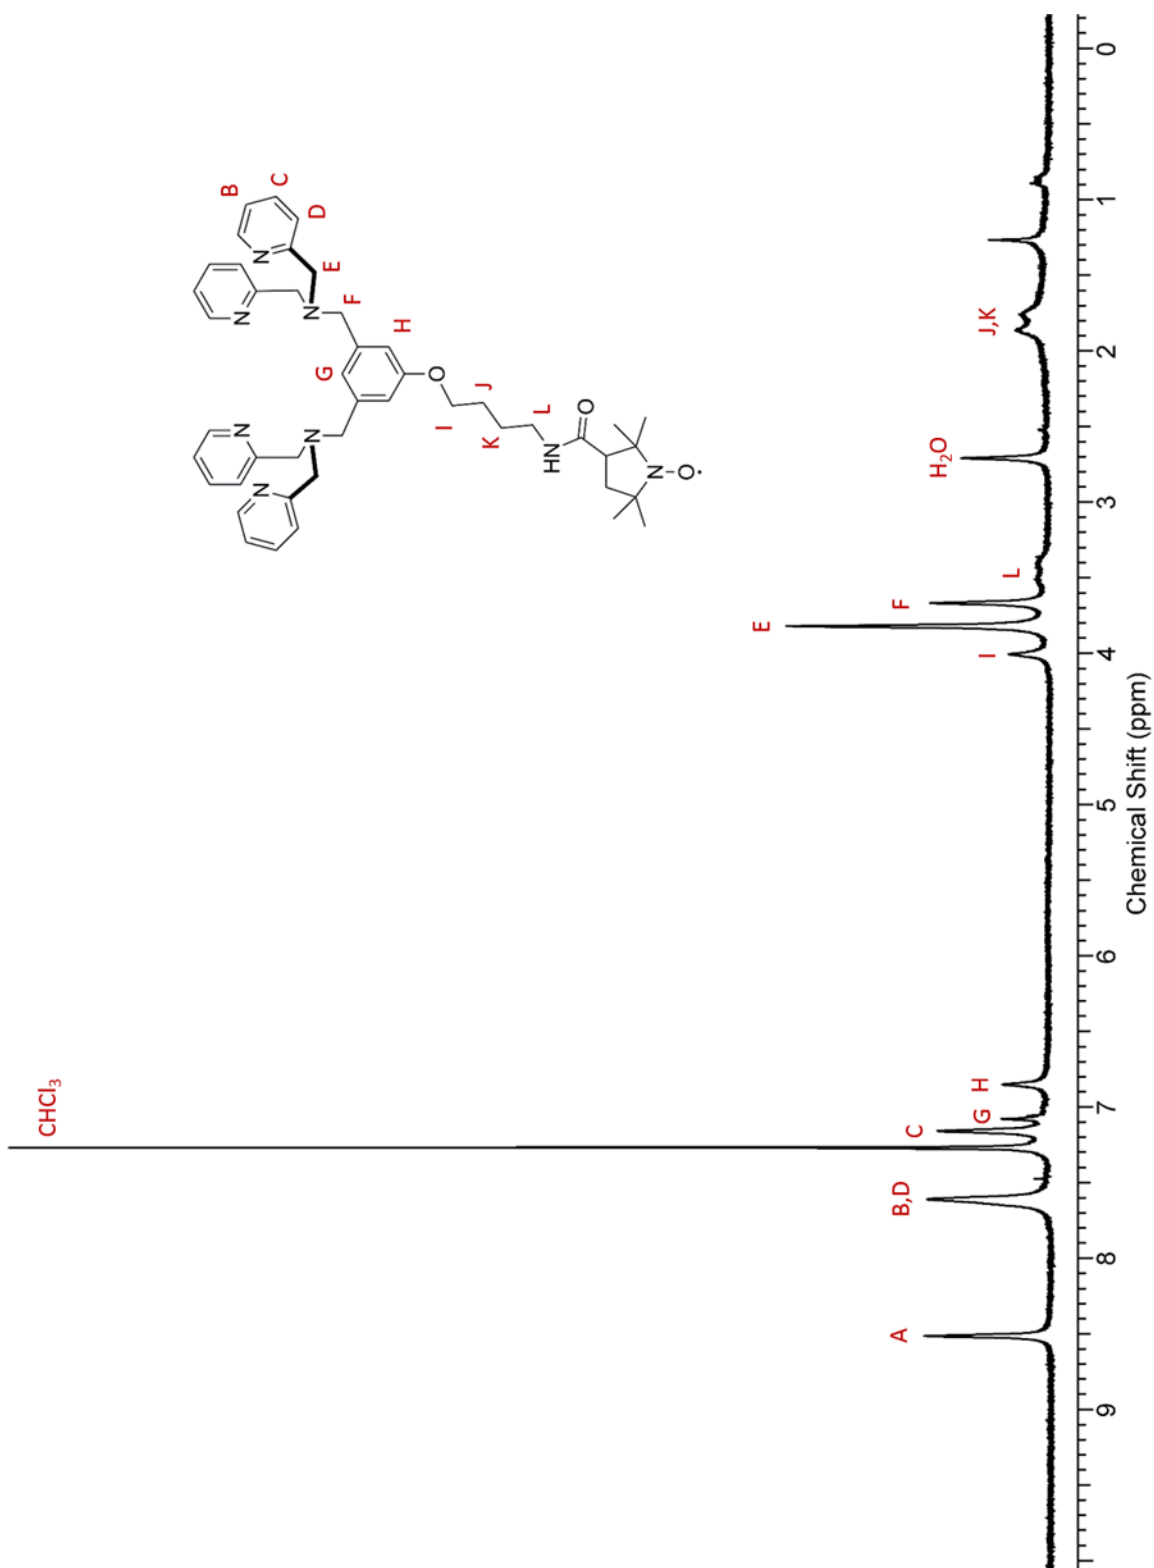

S4  $^1\text{H}$  NMR

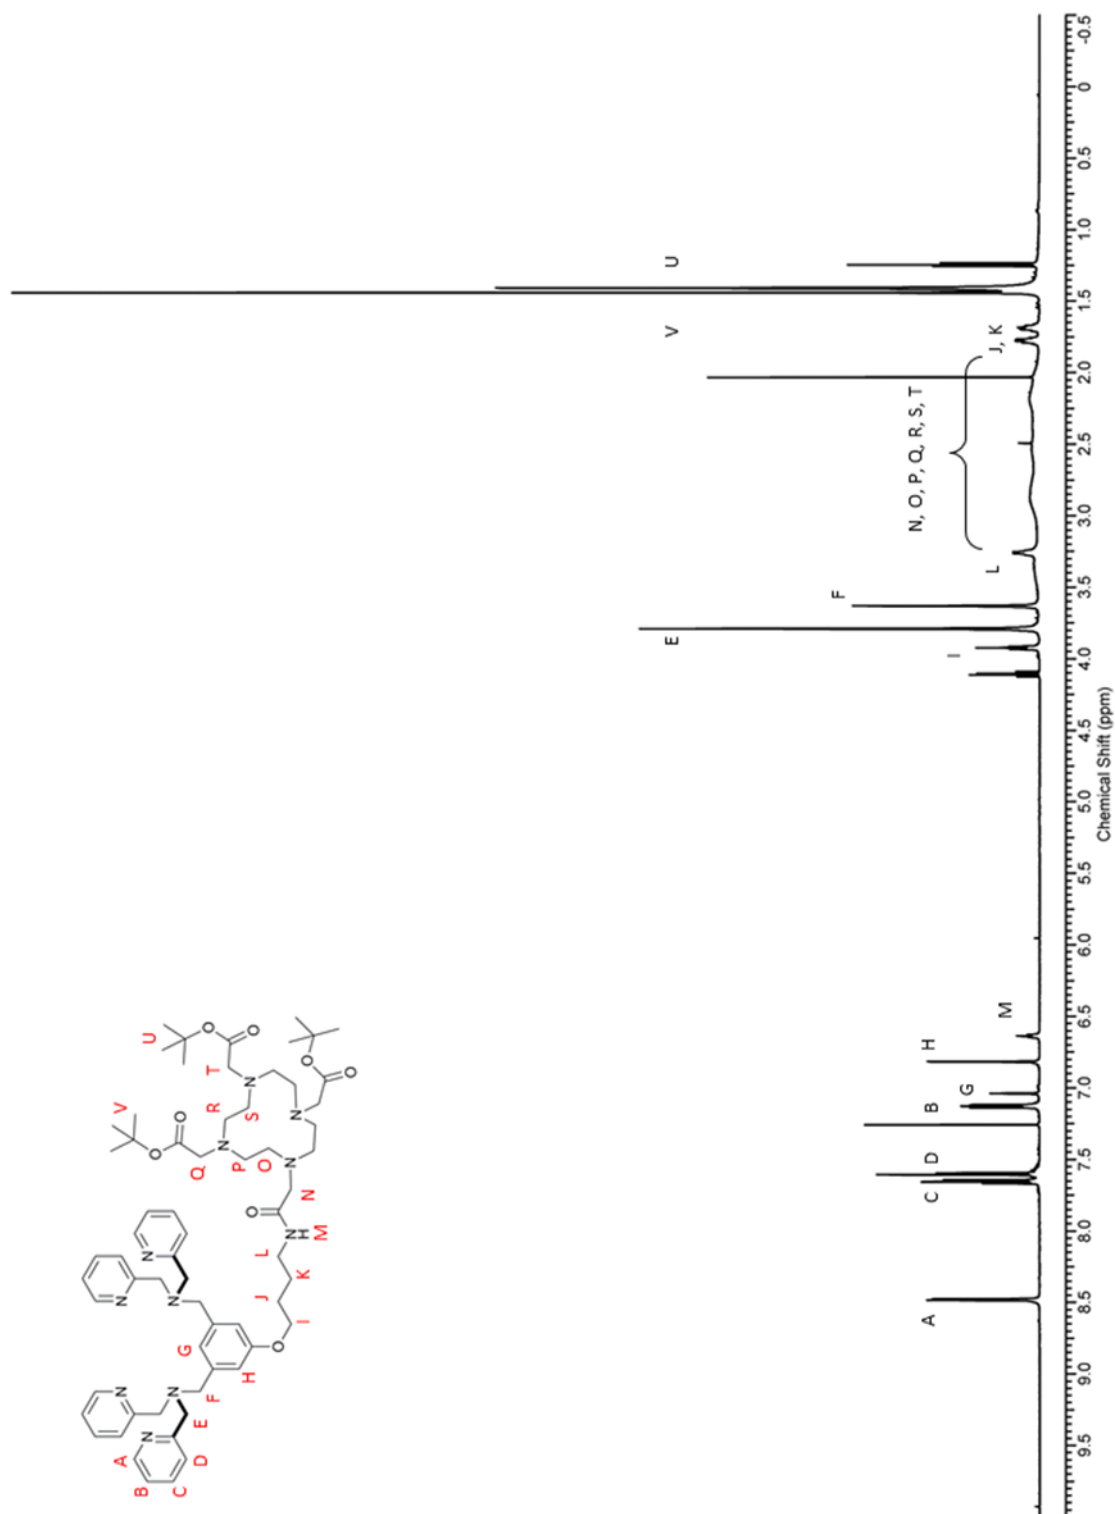

S4  $^{13}\text{C}$  NMR

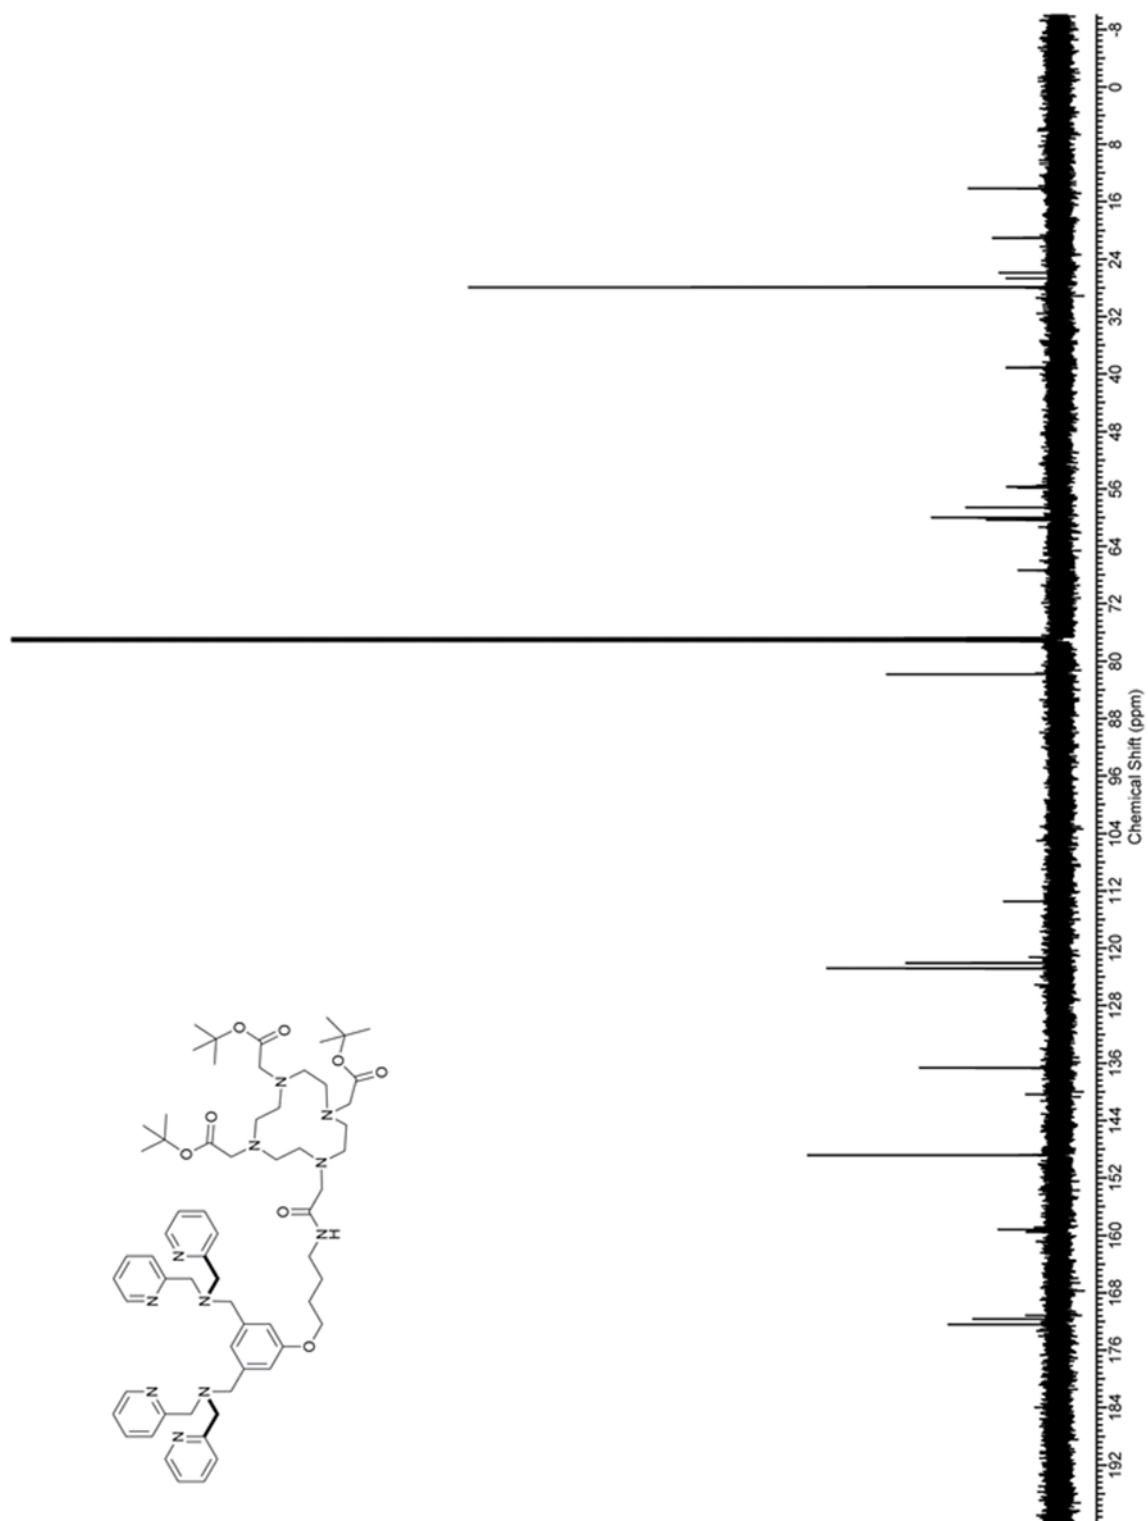

S5  $^1\text{H}$  NMR

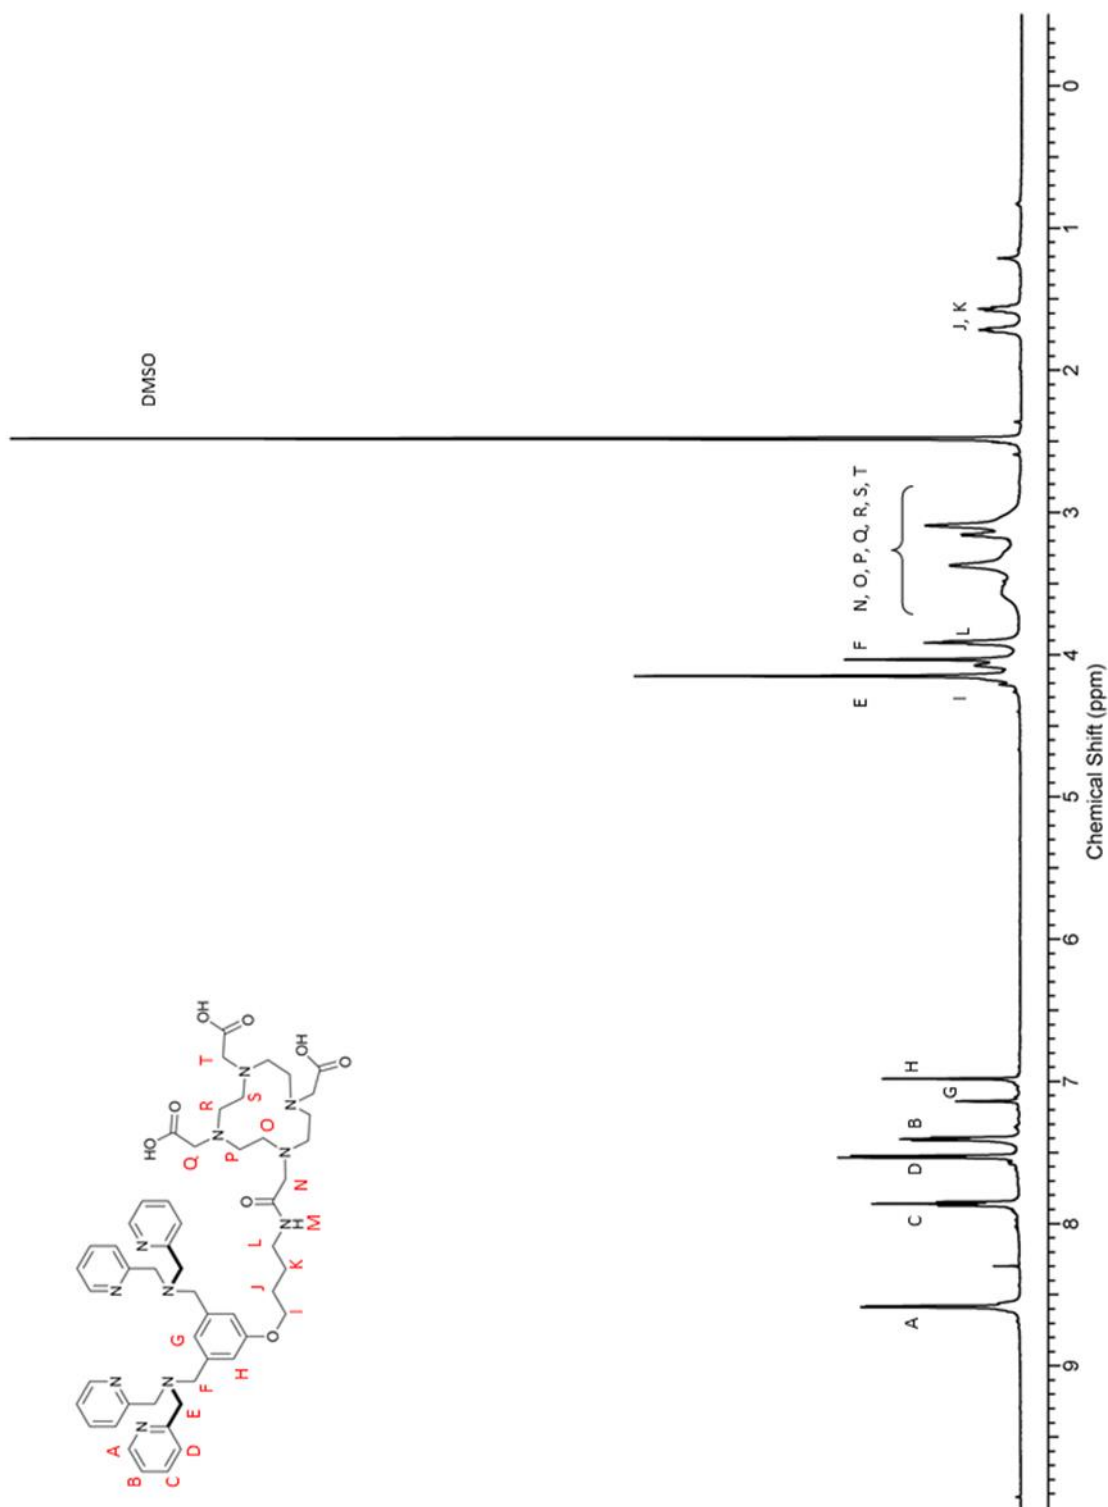

### $^1\text{H}$ NMR

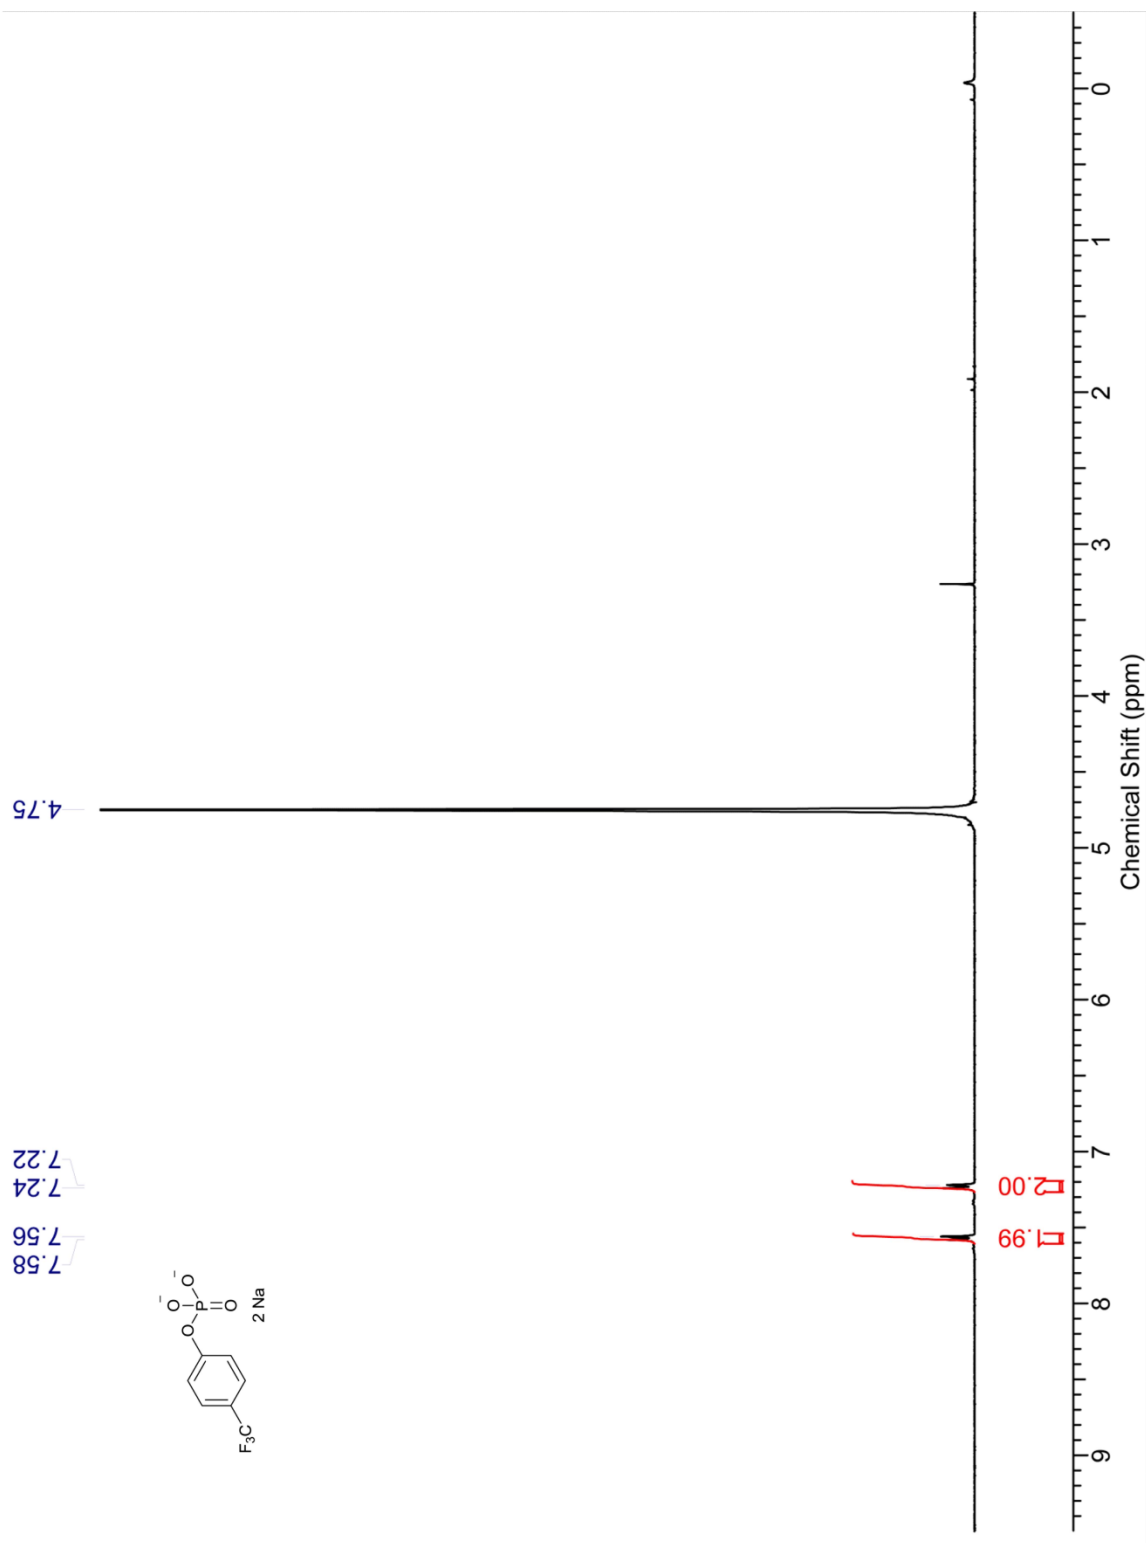

**3**  $^{19}\text{F}$  NMR (including internal trifluoroethanol (TFE) standard at -150.4 ppm)

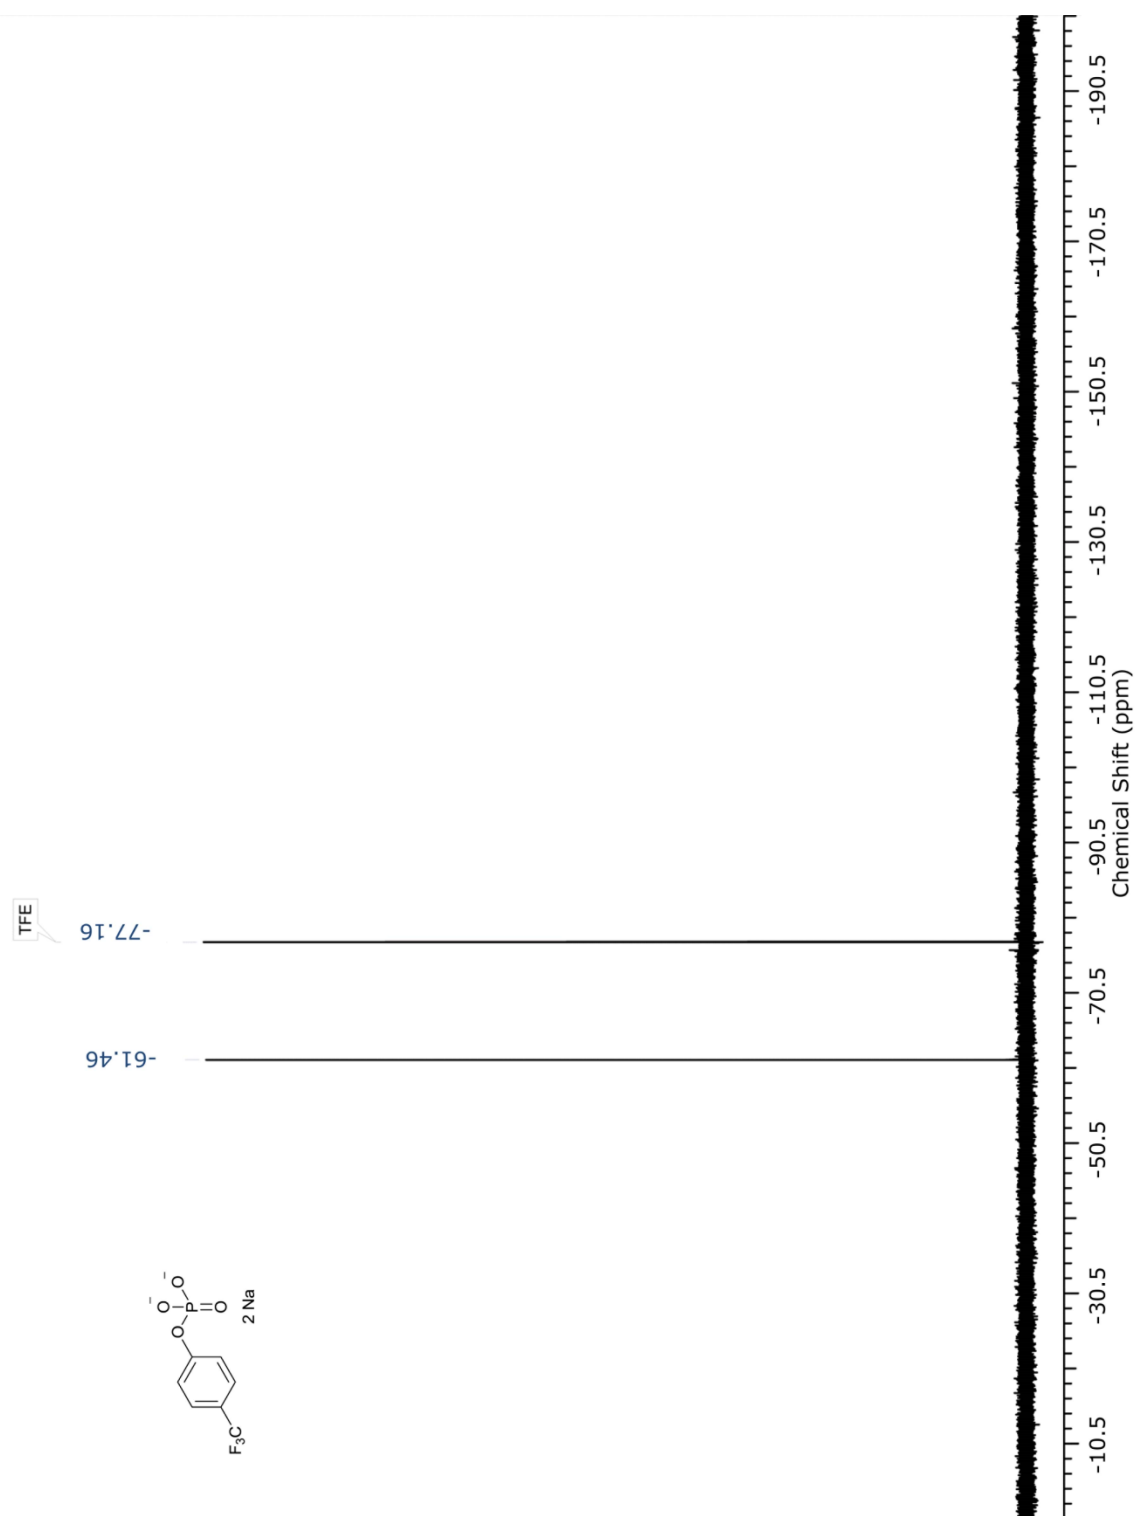



**3**  $^{31}\text{P}$  NMR (including internal  $\text{NaPF}_6$  standard at 0 ppm)

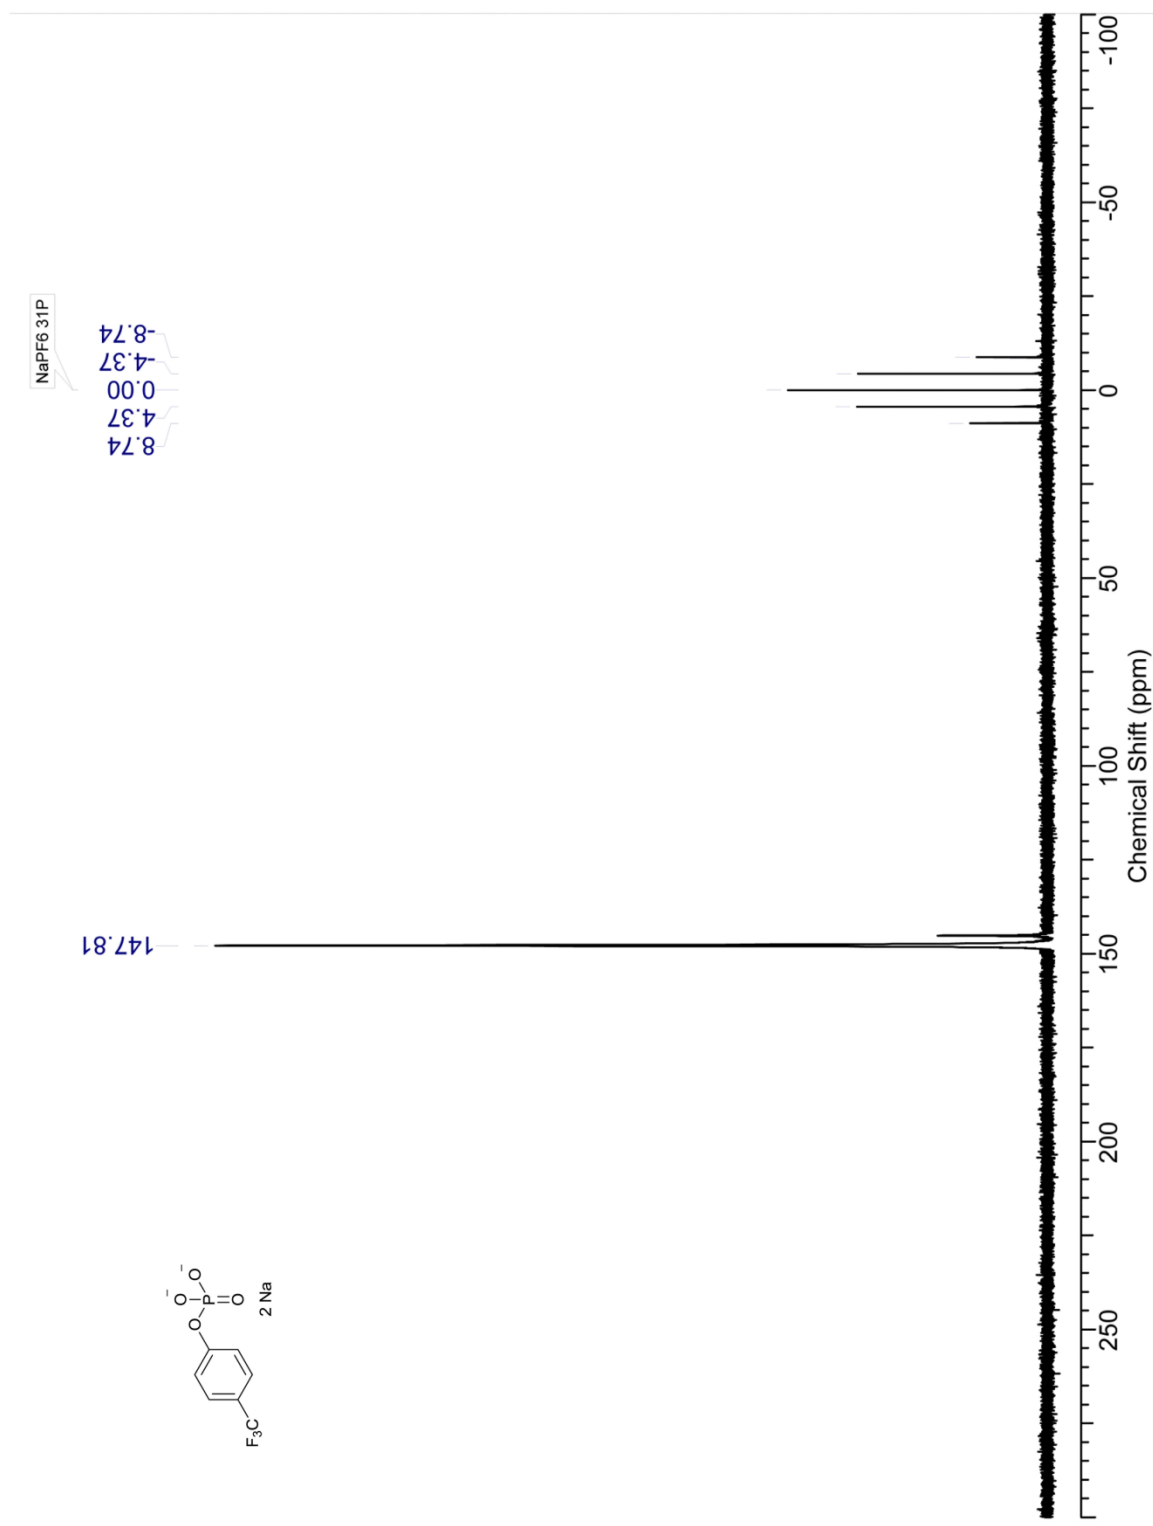

## 5. LCMS Data:

Dionex RSLC coupled to a Bruker micrOTOF Q II with a Dionex Acclaim RSLC 120 C18 2.2 $\mu$ m 2.1 x 100 mm reversed-phase column. Mobile Phase A = water with 0.1 formic acid; Mobile Phase B = acetonitrile with 0.1% formic acid. Flow rate = 0.4 mL/min and column temp = 50 degrees. The initial mobile phase was 95% A/5% B which was ramped to 100%B over 6 minutes. 100% B was held for 2 minutes and then the column was re-equilibrated. The LC eluent entered the electrospray source of the micrOTOF Q II and was analyzed by the Q-TOF mass analyzer.

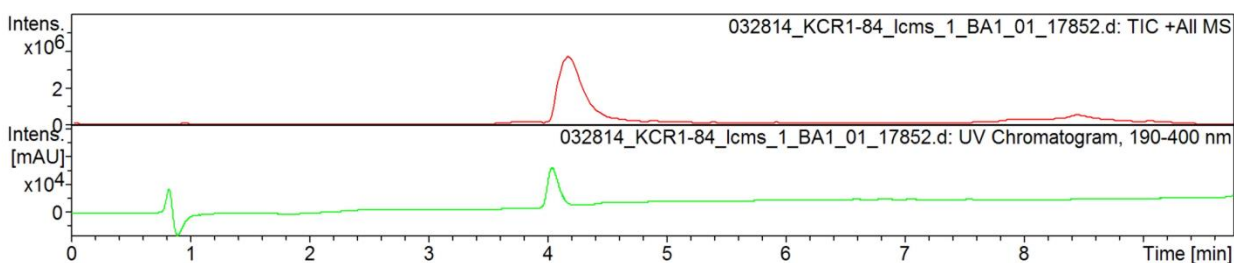

**Figure S6:** LCMS trace for compound **apo-1**, retention time = 4.2 minutes

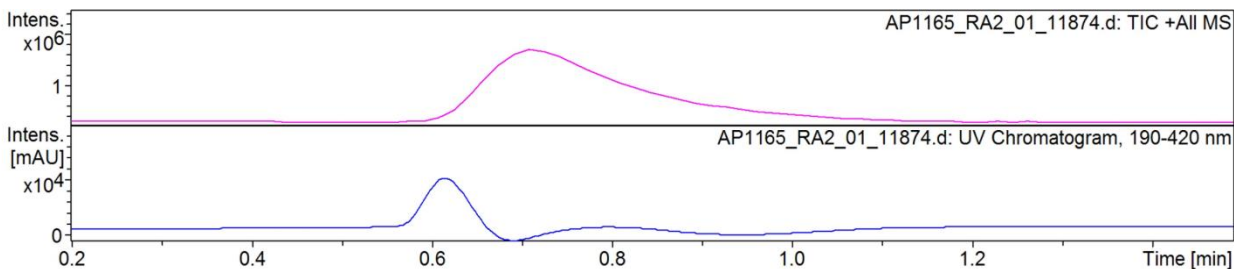

**Figure S7:** LCMS trace for compound **apo-2**, retention time = 0.6 minutes

## 6. References:

1. Y. Liu, F. A. Villamena, Y. Song, J. Sun, A. Rockenbauer and J. L. Zweier, *J. Org. Chem.*, 2010, **75**, 7796-7802.
2. C. Lakshmi, R. G. Hanshaw and B. D. Smith, *Tetrahedron*, 2004, **60**, 11307-11315.
3. (a) L. M. Matosziuk, A. S. Harney, K. W. MacRenaris and T. J. Meade, *Eur. J. Inorg. Chem.*, 2012, 2099-2107; (b) C. R. De Silva, J. Vagner, R. Lynch, R. J. Gillies and V. J. Hruby, *Anal. Biochem.*, 2010, **398**, 15-23.
4. (a) T. L. Born, J. K. Myers, T. S. Widlanski and F. Rusnak, *J. Biol. Chem.*, 1995, **270**, 25651-25655; (b) Z. Y. Zhang and R. L. VanEtten, *J. Biol. Chem.*, 1991, **266**, 1516-1525.
